# Supplementary material for: Modeling of a Biomass-based Energy Production Case Study Using Flexible Inputs with the P-Graph Framework
Source: Preprints.org preprint supplement (doi:10.20944/preprints202311.1389.v1), 2023-11-22
Supplement: Supplementary file 1 [file regression-calculations.xlsx]

## Sheet: params
		Manure	Inter	Grass	Corn			Manure	Inter	Grass	Corn
	L1	4511	370	246	232		L1	4511	370	246	232
	L2	1100	0	60	0		L2	1100	90	60	57
	L3	2089	172	114	107		L3	2089	172	114	107
	L4	1867	154	102	96		L4	1867	154	102	96
	L5	878	72	48	45		L5	878	72	48	45
	L6	1100	90	60	57		L6	1100	90	60	57
	L7	1756	144	96	91		L7	1756	144	96	91
	L8	2200	0	0	0		L8	2200	180	120	113
		15501	1002	726	628
	DM	0.09	1	1	1			0.09	0.24	0.3	0.33
	min C	5	50	50	65			5	50	50	65
	max C	10	80	80	110			10	80	80	110
	m3 methane	200	300	300	340			200	300	300	340
		6975.45	50100	36300	40820		min totalcost	134195			129358	0.963952
		13950.9	80160	58080	69080		max totalcost	221271			213209	0.963565		213209	129358
		279018	300600	217800	213520		methane	1010938						213561	129488
	DM content	0.09	0.24	0.3	0.33		MJ/L	0.0378
							Mwh/m3	0.0105
	%	50	20	10	20
	L4	168	154	102	96			10614.8
	L5	79	72	48	45
	L6	99	90	60	57
	L1				232
	L2	62		45
	L3		14		108
	L7		105	17	61
	L8
	DM	408	435	272	599
	Fresh	4533.33	1812.5	906.667	1815.15
		75	15	10	0
	L1	406	370	246
	L2	38
	L3	188	158	114
	L7	158		79
	L8	198							kJ/m3
	DM	988	528	439	0			37669	gross	0.0104636
	Fresh	10977.8	2200	1463.33	0		methane	33906	net	0.00941833
	CH4-1	81600	130500	81600	203660		497360	5204.18		1950	2340	4290
	CH4-2	197600	158400	131700	0		487700	4593.32		0.374699	0.449638
								methane:	37669 kJ/m3

## Sheet: R-Ex
								X1	X2	X3	Ypure	Ynoise		SUMMARY OUTPUT			Ypure
	1	0.435747	0.405047	0.583146	0.0985327	0.968253		5.71229	9.39324	1.06679	43.8714	44.5772
	2	0.327309	0.792454	0.144961	0.228117	0.0565668		5.77438	9.72987	0.284684	41.8771	42.4338		Regression Statistics
	3	0.629072	0.861453	0.932974	0.374362	0.0592806		6.74867	10.6559	0.433643	47.1995	47.9555		Multiple R	1
	4	0.781561	0.877999	0.234355	0.797606	0.690208		7.22268	9.99035	1.48781	50.3677	51.1901		R Square	1
	5	0.105489	0.666411	0.652065	0.603835	0.462076		4.98288	9.98489	1.06591	44.1841	44.8897		Adjusted R Square	1
	6	0.520358	0.208572	0.690985	0.6174	0.724128		5.76965	9.10813	1.34153	44.2298	44.973		Standard Error	3.31385e-15
	7	0.13188	0.461246	0.458624	0.550323	0.467899		4.85689	9.38112	1.01822	41.93	42.5734		Observations	100
	8	0.480795	0.531164	0.191082	0.450981	0.83743		5.97355	9.25341	1.28841	44.861	45.5669
	9	0.906437	0.958254	0.621632	0.675266	0.260784		7.67756	10.5381	0.93605	50.7137	51.5411		ANOVA
	10	0.376123	0.973584	0.471906	0.577466	0.938562		6.10195	10.4191	1.51603	49.5252	50.3423			df	SS	MS	F	Significance F
	11	0.865958	0.166809	0.570188	0.516332	0.195146		6.76468	8.90381	0.711479	43.0867	43.7671		Regression	3	1221.2	407.068	3.70682e+31	0
	12	0.639144	0.890223	0.158388	0.464277	0.452792		6.80765	9.93883	0.917068	47.1001	47.8219		Residual	96	1.05423e-27	1.09816e-29
	13	0.894414	0.614052	0.437696	0.0836797	0.71584		7.29729	9.6658	0.79952	46.7901	47.5311		Total	99	1221.2
	14	0.703619	0.262394	0.294376	0.593928	0.332969		6.37325	8.81916	0.926896	42.9116	43.573
	15	0.747471	0.491485	0.19986	0.420598	0.0379109		6.7339	9.18283	0.458509	42.8503	43.4663			Coefficients	Standard Error	t Stat	P-value	Lower 95%	Upper 95%	Lower 95.0%	Upper 95.0%
	16	0.460666	0.456053	0.116763	0.529491	0.403035		5.83805	9.02887	0.932525	42.4928	43.1199		Intercept	4.35207e-14	4.67732e-15	9.30463	4.64112e-15	3.42363e-14	5.28052e-14	3.42363e-14	5.28052e-14
	17	0.865542	0.184825	0.892471	0.175684	0.0632513		6.78145	9.26212	0.238936	42.305	42.9656		X1	2	3.68976e-16	5420409649212170	0	2	2	2	2
	18	0.656557	0.860988	0.730635	0.0970904	0.938092		6.83066	10.4526	1.03518	49.1599	49.9702		X2	3	4.95861e-16	6050087613043110	0	3	3	3	3
	19	0.146741	0.534632	0.383279	0.951503	0.0383027		4.97485	9.45254	0.989805	42.2666	42.9076		X3	4	9.43911e-16	4237688869783270	0	4	4	4	4
	20	0.124445	0.89111	0.688984	0.240853	0.360188		5.26444	10.4712	0.601041	44.3467	45.0257
	21	0.223878	0.85862	0.0166424	0.473443	0.688677		5.53025	9.73388	1.16212	44.9106	45.5831
	22	0.100134	0.000994051	0.652908	0.96014	0.00438107		4.3014	8.6549	0.964521	38.4256	39.0118		SUMMARY OUTPUT			Ynoise
	23	0.545948	0.300821	0.210589	0.675648	0.0240241		5.93867	8.81223	0.699672	41.1127	41.7055
	24	0.961254	0.873637	0.945584	0.842633	0.247207		7.7574	10.6929	1.08984	51.9527	52.8325		Regression Statistics
	25	0.349716	0.841098	0.288428	0.943224	0.448407		5.89025	9.97062	1.39163	47.2589	48.0166		Multiple R	0.999976
	26	0.320686	0.69189	0.649384	0.126061	0.0968579		5.65395	10.0332	0.222919	42.2991	42.913		R Square	0.999953
	27	0.641476	0.797935	0.883706	0.253326	0.406504		6.72236	10.4796	0.65983	47.5228	48.2952		Adjusted R Square	0.999951
	28	0.492899	0.315041	0.908841	0.23844	0.399689		5.79374	9.53892	0.638129	42.7568	43.443		Standard Error	0.0251381
	29	0.833502	0.415902	0.990535	0.12376	0.836771		6.91641	9.82234	0.960531	47.142	47.942		Observations	100
	30	0.92059	0.0506336	0.0823174	0.360574	0.824383		6.8124	8.18358	1.18496	42.9154	43.5845
	31	0.822445	9.37085e-05	0.367365	0.152107	0.865163		6.46743	8.36755	1.01727	42.1066	42.771		ANOVA
	32	0.791773	0.03484	0.308066	0.140858	0.282497		6.41016	8.37775	0.423355	39.647	40.2052			df	SS	MS	F	Significance F
	33	0.426149	0.0779928	0.423778	0.66713	0.0770481		5.35644	8.57976	0.744178	39.4289	40.0072		Regression	3	1282.56	427.521	676541	1.94328e-207
	34	0.810144	0.316409	0.946638	0.214152	0.943164		6.74684	9.57946	1.15732	46.8613	47.6651		Residual	96	0.0606645	0.000631922
	35	0.703197	0.888671	0.926667	0.328813	0.49483		6.99826	10.704	0.823643	49.4031	50.2207		Total	99	1282.62
	36	0.265879	0.998231	0.812343	0.218369	0.854227		5.79587	10.8088	1.0726	48.3085	49.1021
	37	0.815564	0.00197993	0.829041	0.51364	0.230287		6.44867	8.833	0.743926	42.3721	43.0635			Coefficients	Standard Error	t Stat	P-value	Lower 95%	Upper 95%	Lower 95.0%	Upper 95.0%
	38	0.0935249	0.638142	0.366002	0.0236561	0.653196		4.91872	9.64229	0.676852	41.4717	42.0674		Intercept	-0.371343	0.0354811	-10.466	1.48906e-17	-0.441773	-0.300914	-0.441773	-0.300914
	39	0.177309	0.701839	0.220899	0.198019	0.439039		5.23377	9.62458	0.637057	41.8895	42.4789		X1	2.04542	0.00279896	730.777	1.35401e-181	2.03986	2.05097	2.03986	2.05097
	40	0.489782	0.253427	0.353286	0.866412	0.399606		5.72277	8.86014	1.26602	43.09	43.7774		X2	3.06939	0.00376148	816.006	3.41334e-186	3.06192	3.07686	3.06192	3.07686
	41	0.780285	0.436483	0.762978	0.723047	0.913458		6.77734	9.63594	1.6365	49.0085	49.859		X3	4.14133	0.00716028	578.375	7.59787e-172	4.12711	4.15554	4.12711	4.15554
	42	0.926003	0.944591	0.856163	0.00127842	0.527902		7.7226	10.7453	0.52918	49.798	50.6049
	43	0.119561	0.390814	0.645008	0.82634	0.762224		4.7495	9.42664	1.58856	44.1332	44.874
	44	0.990413	0.824112	0.763903	0.556804	0.515117		7.79535	10.4121	1.07192	51.1148	51.9692
	45	0.951242	0.802927	0.278534	0.618756	0.85127		7.65665	9.88439	1.47003	50.8466	51.6836
	46	0.51489	0.431257	0.00677922	0.810598	0.456146		5.97593	8.86929	1.26674	43.6267	44.293
	47	0.0383552	0.69648	0.541748	0.571355	0.574309		4.81155	9.93471	1.14566	44.0099	44.7059
	48	0.615506	0.409543	0.824959	0.137033	0.946057		6.25606	9.64405	1.08309	45.7766	46.5425
	49	0.0693272	0.401712	0.358846	0.930856	0.154542		4.60969	9.16227	1.0854	41.0478	41.6667
	50	0.946661	0.105461	0.330067	0.555107	0.0924262		6.94544	8.54099	0.647533	42.104	42.7411
	51	0.646262	0.0807359	0.175953	0.812193	0.284338		6.01952	8.33742	1.09653	41.4374	42.0698
	52	0.649911	0.961968	0.338672	0.430071	0.237463		6.9117	10.2626	0.667534	47.2814	48.005
	53	0.194552	0.5547	0.135921	0.674629	0.138791		5.13835	9.24532	0.81342	41.2664	41.8492
	54	0.117935	0.721288	0.842384	0.591195	0.0389863		5.07509	10.285	0.630181	43.5258	44.2058
	55	0.752536	0.589817	0.0537905	0.450666	0.190888		6.84742	9.23342	0.641554	43.9613	44.5997
	56	0.0812204	0.242687	0.969331	0.32152	0.201956		4.48635	9.45471	0.523476	39.4307	40.0335
	57	0.360704	0.167689	0.914579	0.624851	0.847877		5.2498	9.24996	1.47273	44.1404	44.904
	58	0.736725	0.63334	0.380592	0.666385	0.384491		6.84352	9.64727	1.05088	46.8324	47.5809
	59	0.899479	0.163959	0.364178	0.454953	0.237422		6.8624	8.6921	0.692375	42.5706	43.2217
	60	0.935776	0.180795	0.0156828	0.848385	0.722854		6.98812	8.37727	1.57124	45.393	46.1283
	61	0.39609	0.5939	0.486165	0.687877	0.167212		5.78217	9.67397	0.855088	44.0066	44.6894
	62	0.558477	0.373	0.27278	0.364641	0.662955		6.04843	9.01878	1.0276	43.2636	43.9317
	63	0.822271	0.633995	0.0418988	0.949443	0.253095		7.10081	9.30989	1.20254	46.9414	47.6764
	64	0.74265	0.993963	0.597795	0.201207	0.87073		7.22191	10.5857	1.07194	50.4887	51.3141
	65	0.0384615	0.558568	0.05376	0.0485037	0.879362		4.67395	9.1709	0.927865	40.5721	41.134
	66	0.227561	0.267318	0.845904	0.333813	0.57907		4.95	9.38054	0.912883	41.6932	42.3645
	67	0.548597	0.359226	0.302862	0.200768	0.77351		6.00502	9.02131	0.974278	42.9711	43.6321
	68	0.450179	0.989721	0.796938	0.639049	0.543402		6.34026	10.7764	1.18245	49.7395	50.5664
	69	0.791383	0.484311	0.472193	0.411839	0.927536		6.85846	9.44082	1.33937	47.3969	48.1826
	70	0.0987303	0.0851399	0.307282	0.110813	0.195256		4.38133	8.47756	0.306069	35.4196	35.8189
	71	0.785712	0.761196	0.722313	0.5995	0.609933		7.11833	10.2447	1.20943	49.8085	50.6426
	72	0.0454961	0.990129	0.751631	0.546413	0.975201		5.12662	10.7319	1.52161	48.5354	49.3489
	73	0.307968	0.504914	0.451322	0.954821	0.596251		5.42882	9.46115	1.55107	45.4454	46.1957
	74	0.804806	0.72837	0.657667	0.627377	0.350172		7.14279	10.1144	0.977548	48.539	49.335
	75	0.897425	0.835887	0.937884	0.0723072	0.323249		7.52816	10.6097	0.395556	48.4675	49.2507
	76	0.454023	0.00209484	0.74867	0.750779	0.637476		5.36416	8.75286	1.38826	42.5399	43.2601
	77	0.353636	0.802563	0.275588	0.53661	0.167716		5.86347	9.88071	0.704327	44.1864	44.84
	78	0.216779	0.276197	0.704365	0.41919	0.14527		4.92653	9.25676	0.564459	39.8812	40.4748
	79	0.842394	0.871691	0.995536	0.364584	0.353608		7.39887	10.7389	0.718191	49.8873	50.7152
	80	0.937045	0.43763	0.50412	0.760826	0.888313		7.24877	9.37938	1.64914	49.2322	50.0722
	81	0.847997	0.66659	0.899143	0.115468	0.677275		7.21058	10.2323	0.792742	48.2891	49.0899
	82	0.400542	0.303154	0.519744	0.397339	0.856087		5.50478	9.12605	1.25343	43.4014	44.1052
	83	0.0319103	0.71359	0.469817	0.769472	0.533424		4.80932	9.897	1.3029	44.5212	45.2309
	84	0.883196	0.023021	0.0181552	0.115243	0.513991		6.67261	8.0642	0.629234	40.0547	40.6122
	85	0.0362809	0.409495	0.416044	0.972662	0.484602		4.51834	9.23503	1.45726	42.5708	43.2519
	86	0.0824888	0.549007	0.492899	0.781213	0.384454		4.79647	9.59091	1.16567	43.0284	43.7051
	87	0.480271	0.623078	0.141567	0.794842	0.0992793		6.06389	9.38772	0.894122	43.8674	44.5215
	88	0.40352	0.892362	0.495986	0.77401	0.470375		6.10292	10.2807	1.24439	48.0255	48.8048
	89	0.258666	0.0569354	0.00135928	0.335172	0.670188		4.83293	8.11523	1.00536	38.033	38.5473
	90	0.0788991	0.392623	0.973817	0.784047	0.338038		4.62932	9.75906	1.12208	43.0242	43.7407
	91	0.27924	0.329666	0.205129	0.113423	0.455213		5.16739	8.86446	0.568635	39.2027	39.7286
	92	0.670188	0.592266	0.52879	0.162341	0.150994		6.60283	9.71332	0.313335	43.599	44.2477
	93	0.0819281	0.094378	0.455274	0.395623	0.959861		4.34016	8.64403	1.35548	40.0343	40.6648
	94	0.133698	0.372983	0.692851	0.645515	0.232973		4.77408	9.43882	0.878488	41.3786	42.0232
	95	0.706196	0.455403	0.687117	0.0600553	0.3718		6.57399	9.59792	0.431856	43.6692	44.3445
	96	0.710273	0.0175518	0.79119	0.799099	0.174371		6.14837	8.82629	0.97347	42.6695	43.3755
	97	0.90375	0.923786	0.740024	0.46993	0.663406		7.63504	10.5876	1.13334	51.5662	52.4265
	98	0.221354	0.823843	0.713319	0.282264	0.788098		5.4879	10.361	1.07036	46.3403	47.0924
	99	0.707734	0.214469	0.738327	0.913145	0.737858		6.33767	9.16726	1.651	46.7811	47.595
	100	0.433655	0.792694	0.49692	0.993309	0.370842		6.09366	10.0823	1.36415	47.8908	48.6766

## Sheet: R-Zero
								X0	X1	X2	Ynull	Ydiff	Ynoise		SUMMARY OUTPUT			X1,X2	Ynull	CZ? NO
	1	0.844771	0.806122	0.745396	0.914099	0.162588		1	3.26314	1.6595	24.669	26.669	26.8316
	2	0.748872	0.079783	0.941063	0.318944	0.369763		1	0.988221	1.26001	12.7729	14.7729	15.1427		Regression Statistics
	3	0.817888	0.439954	0.674152	0.029048	0.33214		1	2.13775	0.7032	13.4734	15.4734	15.8055		Multiple R	1
	4	0.827662	0.445043	0.299078	0.495838	0.926277		1	2.16279	0.794916	14.2156	16.2156	17.1419		R Square	1
	5	0.368029	0.0239628	0.379294	0.133581	0.961914		1	0.439917	0.512875	5.34979	7.34979	8.31171		Adjusted R Square	1
	6	0.635587	0.395278	0.868235	0.177382	0.333341		1	1.82142	1.04562	14.605	16.605	16.9383		Standard Error	1.75089e-15
	7	0.386144	0.573606	0.496216	0.646325	0.0415525		1	2.10696	1.14254	16.4256	18.4256	18.4672		Observations	100
	8	0.444045	0.0717747	0.139579	0.811	0.671975		1	0.659369	0.950579	9.29153	11.2915	11.9635
	9	0.94853	0.48372	0.103948	0.557939	0.253223		1	2.39969	0.661887	14.232	16.232	16.4852		ANOVA
	10	0.116398	0.986716	0.418765	0.754185	0.1425		1	3.07655	1.17295	20.5168	22.5168	22.6593			df	SS	MS	F	Significance F
	11	0.00903926	0.534029	0.263149	0.503209	0.640936		1	1.61113	0.766358	11.809	13.809	14.4499		Regression	2	1668.22	834.109	2.72085e+32	0
	12	0.281039	0.715037	0.669307	0.925297	0.419299		1	2.42615	1.5946	20.8668	22.8668	23.2861		Residual	97	2.97366e-28	3.06562e-30
	13	0.402188	0.938356	0.780238	0.754779	0.859129		1	3.21726	1.53502	23.6141	25.6141	26.4733		Total	99	1668.22
	14	0.592436	0.661192	0.053726	0.394799	0.726236		1	2.57601	0.448525	13.4437	15.4437	16.17
	15	0.0256702	0.214084	0.904475	0.952807	0.226617		1	0.667923	1.85728	15.6727	17.6727	17.8993			Coefficients	Standard Error	t Stat	P-value	Lower 95%	Upper 95%	Lower 95.0%	Upper 95.0%
	16	0.816411	0.718637	0.765735	0.227079	0.209996		1	2.97232	0.992814	18.839	20.839	21.049		Intercept	7.10543e-15	6.70166e-16	10.6025	6.73882e-18	5.77533e-15	8.43552e-15	5.77533e-15	8.43552e-15
	17	0.299231	0.324584	0.491681	0.86498	0.541515		1	1.27298	1.35666	14.5886	16.5886	17.1301		X1	4	2.1762e-16	18380663916774800	0	4	4	4	4
	18	0.673037	0.698847	0.0982943	0.891046	0.950563		1	2.76958	0.98934	18.0037	20.0037	20.9543		X2	7	4.47814e-16	15631484828091000	0	7	7	7	7
	19	0.295978	0.489563	0.0984739	0.664835	0.767262		1	1.76467	0.763309	12.4018	14.4018	15.1691
	20	0.0516494	0.453773	0.352382	0.474959	0.480855		1	1.41297	0.827341	11.4433	13.4433	13.9241		SUMMARY OUTPUT			X1,X2	Ynull	CZ? YES
	21	0.129706	0.500088	0.174304	0.30848	0.757628		1	1.62997	0.482785	9.89937	11.8994	12.657
	22	0.875187	0.384896	0.431506	0.208584	0.63071		1	2.02987	0.640089	12.6001	14.6001	15.2308		Regression Statistics
	23	0.787939	0.154067	0.492746	0.53047	0.661954		1	1.25014	1.02322	12.1631	14.1631	14.825		Multiple R	1
	24	0.787972	0.549308	0.0499632	0.435988	0.882308		1	2.43589	0.485951	13.1452	15.1452	16.0275		R Square	1
	25	0.326917	0.21783	0.467969	0.1663	0.396024		1	0.980407	0.634269	8.36151	10.3615	10.7575		Adjusted R Square	0.989796
	26	0.382091	0.738246	0.285197	0.170826	0.557012		1	2.59683	0.456023	13.5795	15.5795	16.1365		Standard Error	3.32592e-15
	27	0.514838	0.671013	0.7801	0.123685	0.734594		1	2.52788	0.903785	16.438	18.438	19.1726		Observations	100
	28	0.00920617	0.214418	0.35554	0.801141	0.862423		1	0.65246	1.15668	10.7066	12.7066	13.569
	29	0.631979	0.500185	0.560834	0.964727	0.218558		1	2.13253	1.52556	19.2091	21.2091	21.4276		ANOVA
	30	0.624872	0.608859	0.882589	0.29596	0.95209		1	2.45145	1.17855	18.0556	20.0556	21.0077			df	SS	MS	F	Significance F
	31	0.886249	0.00677442	0.942197	0.257572	0.305899		1	0.906572	1.19977	12.0247	14.0247	14.3306		Regression	2	24173.1	12086.5	1.09264e+33	0
	32	0.104797	0.426957	0.238568	0.529274	0.427778		1	1.38567	0.767842	10.9176	12.9176	13.3453		Residual	98	1.08405e-27	1.10617e-29
	33	0.81352	0.866947	0.0443395	0.961998	0.570653		1	3.41436	1.00634	20.7018	22.7018	23.2725		Total	100	24173.1
	34	0.231953	0.78383	0.0129024	0.755453	0.639844		1	2.58344	0.768355	15.7123	17.7123	18.3521
	35	0.429058	0.38575	0.453179	0.781895	0.811106		1	1.58631	1.23507	14.9908	16.9908	17.8019			Coefficients	Standard Error	t Stat	P-value	Lower 95%	Upper 95%	Lower 95.0%	Upper 95.0%
	36	0.128895	0.9176	0.446114	0.5125	0.5476		1	2.88169	0.958614	18.2371	20.2371	20.7847		Intercept	0	#N/A	#N/A	#N/A	#N/A	#N/A	#N/A	#N/A
	37	0.214434	0.404273	0.00299792	0.317259	0.0126654		1	1.42725	0.320257	7.9508	9.9508	9.96347		X1	4	2.98508e-16	13399971474501200	0	4	4	4	4
	38	0.932406	0.0447042	0.990364	0.428317	0.386466		1	1.06652	1.41868	14.1968	16.1968	16.5833		X2	7	5.89827e-16	11867883503203900	0	7	7	7	7
	39	0.652299	0.140897	0.948054	0.337064	0.840059		1	1.07499	1.28512	13.2958	15.2958	16.1358
	40	0.407826	0.160347	0.992176	0.316371	0.815203		1	0.888867	1.30855	12.7153	14.7153	15.5305		SUMMARY OUTPUT			X1,X2	Ydiff	CZ? NO
	41	0.770203	0.126308	0.455152	0.549106	0.237335		1	1.14913	1.00426	11.6263	13.6263	13.8636
	42	0.717914	0.211345	0.0202233	0.387129	0.852719		1	1.35195	0.407352	8.25927	10.2593	11.112		Regression Statistics
	43	0.335215	0.617664	0.182125	0.512838	0.5763		1	2.18821	0.694964	13.6176	15.6176	16.1939		Multiple R	1
	44	0.76865	0.629799	0.441678	0.140082	0.308953		1	2.65805	0.581761	14.7045	16.7045	17.0135		R Square	1
	45	0.618327	0.52507	0.761636	0.204542	0.040457		1	2.19354	0.966178	15.5374	17.5374	17.5779		Adjusted R Square	1
	46	0.485618	0.220975	0.700126	0.303943	0.947594		1	1.14854	1.00407	11.6227	13.6227	14.5703		Standard Error	1.84262e-15
	47	0.784111	0.157727	0.957383	0.285605	0.610935		1	1.25729	1.24299	13.7301	15.7301	16.341		Observations	100
	48	0.423936	0.45001	0.815226	0.969084	0.323019		1	1.77397	1.78431	19.586	21.586	21.9091
	49	0.347364	0.353155	0.949763	0.826619	0.309703		1	1.40683	1.77638	18.062	20.062	20.3717		ANOVA
	50	0.432932	0.77002	0.226883	0.964593	0.0121414		1	2.74299	1.19148	19.3123	21.3123	21.3244			df	SS	MS	F	Significance F
	51	0.845119	0.629558	0.513041	0.6069	0.818152		1	2.73379	1.11994	18.7748	20.7748	21.5929		Regression	2	1668.22	834.109	2.4567e+32	0
	52	0.688405	0.120687	0.226723	0.991742	0.738108		1	1.05046	1.21847	12.7311	14.7311	15.4692		Residual	97	3.29339e-28	3.39525e-30
	53	0.92154	0.318583	0.501554	0.60283	0.32718		1	1.87729	1.10438	15.2398	17.2398	17.567		Total	99	1668.22
	54	0.988263	0.753185	0.347052	0.951346	0.0961409		1	3.24782	1.2984	22.0801	24.0801	24.1762
	55	0.483963	0.21349	0.423536	0.00586019	0.585203		1	1.12443	0.429396	7.5035	9.5035	10.0887			Coefficients	Standard Error	t Stat	P-value	Lower 95%	Upper 95%	Lower 95.0%	Upper 95.0%
	56	0.150381	0.0830535	0.704586	0.618847	0.533703		1	0.399542	1.32343	10.8622	12.8622	13.3959		Intercept	2	7.05275e-16	2835773597694360	0	2	2	2	2
	57	0.320977	0.64823	0.703509	0.369873	0.25431		1	2.26567	1.07338	16.5763	18.5763	18.8307		X1	4	2.29021e-16	17465655721174000	0	4	4	4	4
	58	0.572016	0.571384	0.959202	0.72774	0.176		1	2.28617	1.68694	20.9533	22.9533	23.1293		X2	7	4.71275e-16	14853333571320600	0	7	7	7	7
	59	0.696292	0.276776	0.690629	0.0234237	0.0058057		1	1.52662	0.714053	11.1049	13.1049	13.1107
	60	0.0656603	0.331432	0.0869266	0.726943	0.263285		1	1.05996	0.81387	9.93692	11.9369	12.2002		SUMMARY OUTPUT			X0,X1,X2	Ydiff	CZ? YES
	61	0.993102	0.260381	0.656943	0.997348	0.0474866		1	1.77425	1.65429	18.677	20.677	20.7245
	62	0.320647	0.44711	0.56878	0.543024	0.80122		1	1.66198	1.1118	14.4305	16.4305	17.2318		Regression Statistics
	63	0.482112	0.0718408	0.376996	0.0308596	0.511784		1	0.697634	0.407855	5.64552	7.64552	8.15731		Multiple R	1
	64	0.60324	0.0153891	0.937706	0.168545	0.416117		1	0.649408	1.10625	10.3414	12.3414	12.7575		R Square	1
	65	0.770197	0.759825	0.565837	0.109266	0.991224		1	3.04967	0.675103	16.9244	18.9244	19.9156		Adjusted R Square	0.989691
	66	0.79408	0.411428	0.648323	0.67722	0.0318892		1	2.02836	1.32554	17.3923	19.3923	19.4242		Standard Error	8.4605e-15
	67	0.686654	0.63846	0.0516619	0.799099	0.559936		1	2.60203	0.850761	16.3635	18.3635	18.9234		Observations	100
	68	0.358405	0.80301	0.0973684	0.202362	0.430823		1	2.76743	0.29973	13.1679	15.1679	15.5987
	69	0.876069	0.792154	0.0654553	0.603345	0.500063		1	3.25253	0.6688	17.6917	19.6917	20.1918		ANOVA
	70	0.673922	0.476364	0.392645	0.61135	0.146225		1	2.10301	1.004	15.44	17.44	17.5862			df	SS	MS	F	Significance F
	71	0.270489	0.543653	0.448767	0.165901	0.680539		1	1.90145	0.614668	11.9085	13.9085	14.589		Regression	3	30573.7	10191.2	1.42375e+32	0
	72	0.0521327	0.736404	0.288263	0.727284	0.826141		1	2.26134	1.01555	16.1542	18.1542	18.9803		Residual	97	6.94327e-27	7.15801e-29
	73	0.842876	0.856716	0.874836	0.923609	0.140342		1	3.41302	1.79845	26.2412	28.2412	28.3816		Total	100	30573.7
	74	0.708474	0.534971	0.230499	0.79482	0.0711934		1	2.31339	1.02532	16.4308	18.4308	18.502
	75	0.200571	0.96312	0.824577	0.589117	0.3853		1	3.08993	1.41369	22.2556	24.2556	24.6409			Coefficients	Standard Error	t Stat	P-value	Lower 95%	Upper 95%	Lower 95.0%	Upper 95.0%
	76	0.317116	0.51249	0.342915	0.324524	0.0923296		1	1.85458	0.667439	12.0904	14.0904	14.1827		Intercept	0	#N/A	#N/A	#N/A	#N/A	#N/A	#N/A	#N/A
	77	0.79035	0.373125	0.120492	0.500012	0.24485		1	1.90972	0.620504	11.9824	13.9824	14.2273		X0	2	3.23831e-15	617605724628292	0	2	2	2	2
	78	0.437889	0.463734	0.520134	0.0913671	0.728912		1	1.82909	0.611501	11.5969	13.5969	14.3258		X1	4	1.05156e-15	3803861128601450	0	4	4	4	4
	79	0.573462	0.84484	0.266866	0.384701	0.646791		1	3.10798	0.651567	16.9929	18.9929	19.6397		X2	7	2.16389e-15	3234921099103160	0	7	7	7	7
	80	0.128185	0.336822	0.792645	0.421474	0.282099		1	1.13865	1.21412	13.0534	15.0534	15.3355
	81	0.497823	0.0433944	0.840707	0.711538	0.411574		1	0.628006	1.55224	13.3777	15.3777	15.7893		SUMMARY OUTPUT			X0,X1,X2	Ynoise	CZ? YES
	82	0.166274	0.81593	0.0908212	0.353469	0.238374		1	2.61406	0.444291	13.5663	15.5663	15.8047
	83	0.356447	0.631669	0.216326	0.996268	0.482231		1	2.25145	1.21259	17.494	19.494	19.9762		Regression Statistics
	84	0.583954	0.308394	0.936497	0.708498	0.0343351		1	1.50914	1.645	17.5515	19.5515	19.5858		Multiple R	0.999882
	85	0.83175	0.489523	0.521174	0.743639	0.559471		1	2.30032	1.26481	18.055	20.055	20.6144		R Square	0.999765
	86	0.979766	0.879161	0.0676091	0.0107178	0.260454		1	3.61725	0.0783269	15.0173	17.0173	17.2777		Adjusted R Square	0.98945
	87	0.70686	0.354222	0.311558	0.13762	0.506431		1	1.76953	0.449179	10.2224	12.2224	12.7288		Standard Error	0.279649
	88	0.977674	0.196404	0.165984	0.973213	0.496513		1	1.56689	1.1392	14.2419	16.2419	16.7384		Observations	100
	89	0.96431	0.567545	0.875083	0.234446	0.737422		1	2.66694	1.10953	18.4345	20.4345	21.1719
	90	0.454716	0.793597	0.83828	0.474767	0.0720629		1	2.83551	1.31305	20.5334	22.5334	22.6054		ANOVA
	91	0.90236	0.276412	0.199409	0.797189	0.924533		1	1.7316	0.996598	13.9026	15.9026	16.8271			df	SS	MS	F	Significance F
	92	0.343153	0.838347	0.435682	0.0772744	0.114321		1	2.85819	0.512956	15.0235	17.0235	17.1378		Regression	3	32204.2	10734.7	137267	3.4319e-174
	93	0.230937	0.852709	0.658048	0.369627	0.579216		1	2.78906	1.02768	18.35	20.35	20.9292		Residual	97	7.58572	0.0782033
	94	0.550237	0.553977	0.589021	0.811315	0.741259		1	2.21217	1.40034	18.651	20.651	21.3923		Total	100	32211.8
	95	0.83926	0.962944	0.781244	0.218056	0.842343		1	3.72809	0.9993	21.9075	23.9075	24.7498
	96	0.996117	0.0485478	0.440743	0.346792	0.50112		1	1.14176	0.787535	10.0798	12.0798	12.5809			Coefficients	Standard Error	t Stat	P-value	Lower 95%	Upper 95%	Lower 95.0%	Upper 95.0%
	97	0.321135	0.702138	0.982346	0.85911	0.712868		1	2.42755	1.84146	22.6004	24.6004	25.3133		Intercept	0	#N/A	#N/A	#N/A	#N/A	#N/A	#N/A	#N/A
	98	0.687397	0.0544544	0.269982	0.892553	0.993663		1	0.850761	1.16253	11.5408	13.5408	14.5344		X0	2.70003	0.107037	25.2251	2.13606e-44	2.48759	2.91247	2.48759	2.91247
	99	0.460602	0.637419	0.251819	0.657039	0.486202		1	2.37286	0.908858	15.8534	17.8534	18.3396		X1	3.95762	0.0347578	113.863	4.37919e-105	3.88863	4.0266	3.88863	4.0266
	100	0.998661	0.30797	0.521923	0.668314	0.327819		1	1.92257	1.19024	16.0219	18.0219	18.3498		X2	6.87132	0.0715238	96.0704	5.45373e-98	6.72937	7.01328	6.72937	7.01328
															SUMMARY OUTPUT			X1,X2	Ynoise	CZ? YES
															Regression Statistics
															Multiple R	0.99767
															R Square	0.995346
															Adjusted R Square	0.99525
															Standard Error	0.279649
															Observations	100
															ANOVA
																df	SS	MS	F	Significance F
															Regression	2	1622.47	811.233	10373.4	7.72799e-114
															Residual	97	7.58572	0.0782033
															Total	99	1630.05
																Coefficients	Standard Error	t Stat	P-value	Lower 95%	Upper 95%	Lower 95.0%	Upper 95.0%
															Intercept	2.70003	0.107037	25.2251	2.13606e-44	2.48759	2.91247	2.48759	2.91247
															X1	3.95762	0.0347578	113.863	4.37919e-105	3.88863	4.0266	3.88863	4.0266
															X2	6.87132	0.0715238	96.0704	5.45373e-98	6.72937	7.01328	6.72937	7.01328

## Sheet: Data
		Manure	Inter	Grass	Corn		Manure	Inter	Grass	Corn
	Mix1	30	0	0	70		0.3	0	0	0.7
	Mix2	30	70	0	0		0.3	0.7	0	0
	Mix3	50	50	0	0		0.5	0.5	0	0
	Mix4	50	20	10	20		0.5	0.2	0.1	0.2
	Mix5	75	0	0	25		0.75	0	0	0.25
	Mix6	75	25	0	0		0.75	0.25	0	0
	Mix7	75	15	10	0		0.75	0.15	0.1	0
	Mix8	100	0	0	0		1	0	0	0
		K80	K160	K250	K500		80	160	250	500
	Mix1	79.7	159.3	248.9	497.9		0.99625	0.995625	0.9956	0.9958
	Mix2	112.2	224.4	350.6	701.2		1.4025	1.4025	1.4024	1.4024
	Mix3	134.6	269.3	420.7	841.4		1.6825	1.68312	1.6828	1.6828
	Mix4	108.5	216.9	338.9	667.8		1.35625	1.35563	1.3556	1.3356
	Mix5	158.6	317.1	495.5	991		1.9825	1.98188	1.982	1.982
	Mix6	194.5	388.9	607.7	1215.4		2.43125	2.43063	2.4308	2.4308
	Mix7	182	364	568.7	1137.3		2.275	2.275	2.2748	2.2746
	Mix8	368.6	737.1	1151.7	2303.4		4.6075	4.60687	4.6068	4.6068
		K80	K160	K250	K500		80	160	250	500
	Mix1	374892	589477	823606	1221043		4686.15	3684.23	3294.42	2442.09
	Mix2	411303	683606	850921	1515837		5141.29	4272.54	3403.68	3031.67
	Mix3	458327	789654	1011043	1748756		5729.09	4935.34	4044.17	3497.51
	Mix4	411303	683606	850921	1451427		5141.29	4272.54	3403.68	2902.85
	Mix5	458327	789654	1011043	1768756		5729.09	4935.34	4044.17	3537.51
	Mix6	460704	780409	1031043	1884821		5758.8	4877.56	4124.17	3769.64
	Mix7	474704	822409	1075558	1798756		5933.8	5140.06	4302.23	3597.51
	Mix8	516058	981547	1305558	2603514		6450.73	6134.67	5222.23	5207.03

## Sheet: Work-RATIO
		Manure	Inter	Grass	Corn		Y	Yest		Intercept	0
	Mix1	0.3	0	0	0.7		2442.09	2334.45		Manure	4752.83
	Mix2	0.3	0.7	0	0		3031.67	2942.75		Inter	2167
	Mix3	0.5	0.5	0	0		3497.51	3459.92		Grass	-2293.63
	Mix4	0.5	0.2	0.1	0.2		2902.85	2840.05		Corn	1298
	Mix5	0.75	0	0	0.25		3537.51	3889.13
	Mix6	0.75	0.25	0	0		3769.64	4106.37
	Mix7	0.75	0.15	0.1	0		3597.51	3660.31
	Mix8	1	0	0	0		5207.03	4752.83
	80	160	250	500	80	160	250	500
	0.99625	0.995625	0.9956	0.9958	4686.15	3684.23	3294.42	2442.09
	1.4025	1.4025	1.4024	1.4024	5141.29	4272.54	3403.68	3031.67
	1.6825	1.68312	1.6828	1.6828	5729.09	4935.34	4044.17	3497.51
	1.35625	1.35563	1.3556	1.3356	5141.29	4272.54	3403.68	2902.85
	1.9825	1.98188	1.982	1.982	5729.09	4935.34	4044.17	3537.51
	2.43125	2.43063	2.4308	2.4308	5758.8	4877.56	4124.17	3769.64
	2.275	2.275	2.2748	2.2746	5933.8	5140.06	4302.23	3597.51
	4.6075	4.60687	4.6068	4.6068	6450.73	6134.67	5222.23	5207.03
	3.79516				6388.26	5864.27	4962.22	4752.83
	0				0	0	0	0
	-3.82386				-1701.01	-2278.11	-2201.04	-2585.83
	-8.76267				-3037.82	-4390.2	-4662.95	-7046.46
	-4.34088				-2492.61	-3202.83	-2577.85	-3454.83
	0.75654				4643.44	3622.29	3157.73	2334.45
	1.11845				5197.56	4269.59	3421.49	2942.75
	1.88323				5537.76	4725.21	3861.7	3459.92
	1.28594				5245.76	4329.06	3540.15	2840.05
	2.70994				5765.11	5063.56	4317.76	3889.13
	2.83919				5963.01	5294.74	4411.96	4106.37
	2.34531				5829.33	5083.53	4165.77	3660.31
	3.79516				6388.26	5864.27	4962.22	4752.83
	0				0	0	0	0
	3.79516				6388.26	5864.27	4962.22	4752.83
	-0.0287039				4687.25	3586.16	2761.18	2167
	-4.96751				3350.44	1474.07	299.268	-2293.63
	-0.545724				3895.65	2661.44	2384.37	1298

## Sheet: ReFit-RATIO
							Heat	Heat	Heat	Heat	Inv-80	Inv-160	Inv-250	Inv-500
						Intercept	0	0	0	0	0	0	0	0
						Manure	3.79516	3.79516	3.79516	3.79516	6388.26	5864.27	4962.22	4752.83
						Inter	-0.0287039	-0.0287039	-0.0287039	-0.0287039	4687.25	3586.16	2761.18	2167
						Grass	-4.96751	-4.96751	-4.96751	-4.96751	3350.44	1474.07	299.268	-2293.63
						Corn	-0.545724	-0.545724	-0.545724	-0.545724	3895.65	2661.44	2384.37	1298
							80	160	250	500	80	160	250	500
		Manure	Inter	Grass	Corn
	Mix1	0.3	0	0	0.7		60.5232	121.046	189.135	378.27	371475	579566	789431	1.16723e+06		60.5232	121.046	189.135	378.27	371475	579566	789431	1.16723e+06
	Mix2	0.3	0.7	0	0		89.4763	178.953	279.613	559.227	415805	683135	855373	1.47138e+06		89.4763	178.953	279.613	559.227	415805	683135	855373	1.47138e+06
	Mix3	0.5	0.5	0	0		150.658	301.316	470.806	941.613	443021	756034	965425	1.72996e+06		150.658	301.316	470.806	941.613	443021	756034	965425	1.72996e+06
	Mix4	0.5	0.2	0.1	0.2		102.875	205.751	321.485	642.97	419661	692650	885037	1.42003e+06		102.875	205.751	321.485	642.97	419661	692650	885037	1.42003e+06
	Mix5	0.75	0	0	0.25		216.795	433.59	677.484	1354.97	461209	810170	1.07944e+06	1.94456e+06		216.795	433.59	677.484	1354.97	461209	810170	1.07944e+06	1.94456e+06
	Mix6	0.75	0.25	0	0		227.135	454.27	709.798	1419.6	477041	847159	1.10299e+06	2.05319e+06		227.135	454.27	709.798	1419.6	477041	847159	1.10299e+06	2.05319e+06
	Mix7	0.75	0.15	0.1	0		187.625	375.249	586.327	1172.65	466346	813365	1.04144e+06	1.83016e+06		187.625	375.249	586.327	1172.65	466346	813365	1.04144e+06	1.83016e+06
	Mix8	1	0	0	0		303.612	607.225	948.789	1897.58	511061	938283	1.24056e+06	2.37642e+06		303.612	607.225	948.789	1897.58	511061	938283	1.24056e+06	2.37642e+06
							79.7	159.3	248.9	497.9	374892	589477	823606	1221043
							112.2	224.4	350.6	701.2	411303	683606	850921	1515837
							134.6	269.3	420.7	841.4	458327	789654	1011043	1748756
							108.5	216.9	338.9	667.8	411303	683606	850921	1451427
							158.6	317.1	495.5	991	458327	789654	1011043	1768756
							194.5	388.9	607.7	1215.4	460704	780409	1031043	1884821
							182	364	568.7	1137.3	474704	822409	1075558	1798756
							368.6	737.1	1151.7	2303.4	516058	981547	1305558	2603514
							0.759388	0.759864	0.759884	0.759731	0.990885	0.983187	0.958506	0.955926
							0.797471	0.797471	0.797528	0.797528	1.01094	0.999311	1.00523	0.970669
							1.1193	1.11889	1.1191	1.1191	0.966604	0.957425	0.95488	0.989251
							0.948159	0.948596	0.948614	0.962819	1.02032	1.01323	1.04009	0.978366
							1.36693	1.36736	1.36727	1.36727	1.00629	1.02598	1.06765	1.0994
							1.16779	1.16809	1.16801	1.16801	1.03546	1.08553	1.06978	1.08933
							1.03091	1.03091	1.031	1.03109	0.982394	0.989003	0.968281	1.01746
							0.823691	0.823802	0.823816	0.823816	0.990317	0.955923	0.950211	0.912773
							0.759388	0.759864	0.759884	0.759731	0.966604	0.955923	0.950211	0.912773
							1.36693	1.36736	1.36727	1.36727	1.03546	1.08553	1.06978	1.0994

## Sheet: Work-FM
		Manure	Inter	Grass	Corn		Y	Yest		Intercept	0
	Mix1	7.14796	0	0	16.6786		2442.09	2586.81		Manure	47.1898
	Mix2	10.7527	25.0896	0	0		3031.67	3095.93		Inter	103.171
	Mix3	22.2222	22.2222	0	0		3497.51	3341.34		Grass	88.5872
	Mix4	18.2349	7.29395	3.64697	7.29395		2902.85	2919.86		Corn	134.873
	Mix5	36.1011	0	0	12.0337		3537.51	3326.63
	Mix6	47.619	15.873	0	0		3769.64	3884.76			2586.81
	Mix7	45.045	9.00901	6.00601	0		3597.51	3587.19			3095.93
	Mix8	111.111	0	0	0		5207.03	5243.31			3341.34
											2919.86
	80	160	250	500	80	160	250	500			3326.63
	0.99625	0.995625	0.9956	0.9958	4686.15	3684.23	3294.42	2442.09			3884.76
	1.4025	1.4025	1.4024	1.4024	5141.29	4272.54	3403.68	3031.67			3587.19
	1.6825	1.68312	1.6828	1.6828	5729.09	4935.34	4044.17	3497.51			5243.31
	1.35625	1.35563	1.3556	1.3356	5141.29	4272.54	3403.68	2902.85
	1.9825	1.98188	1.982	1.982	5729.09	4935.34	4044.17	3537.51
	2.43125	2.43063	2.4308	2.4308	5758.8	4877.56	4124.17	3769.64
	2.275	2.275	2.2748	2.2746	5933.8	5140.06	4302.23	3597.51
	4.6075	4.60687	4.6068	4.6068	6450.73	6134.67	5222.23	5207.03
	0				0	0	0	0
	0.0411573				59.2935	55.9483	47.6665	47.1898
	0.0353441				187.118	152.028	122.087	103.171
	0.015782				246.84	196.982	153.478	88.5872
	0.0415894				267.47	210.541	178.776	134.873
	0.987844				4884.85	3911.44	3322.45	2586.81
	1.32932				5332.27	4415.91	3575.66	3095.93
	1.70003				5475.8	4621.69	3772.3	3341.34
	1.36921				5297.17	4383.16	3623.4	2919.86
	1.9863				5359.21	4553.38	3872.15	3326.63
	2.52089				5793.62	5077.34	4207.72	3884.76
	2.26713				5839.15	5072.89	4168.81	3587.19
	4.57303				6588.16	6216.47	5296.28	5243.31

## Sheet: ReFit-FM
							Heat	Heat	Heat	Heat	Inv-80	Inv-160	Inv-250	Inv-500
						Intercept	0	0	0	0	0	0	0	0		0	0	0	0	0
						Manure	0.0411573	0.0411573	0.0411573	0.0411573	59.2935	55.9483	47.6665	47.1898		0.0411573	59.2935	55.9483	47.6665	47.1898
						Inter	0.0353441	0.0353441	0.0353441	0.0353441	187.118	152.028	122.087	103.171		0.0353441	187.118	152.028	122.087	103.171
						Grass	0.015782	0.015782	0.015782	0.015782	246.84	196.982	153.478	88.5872		0.015782	246.84	196.982	153.478	88.5872
						Corn	0.0415894	0.0415894	0.0415894	0.0415894	267.47	210.541	178.776	134.873		0.0415894	267.47	210.541	178.776	134.873
							80	160	250	500	80	160	250	500
		Manure	Inter	Grass	Corn
	Mix1	7.14796	0	0	16.6786		79.0275	158.055	246.961	493.922	390788	625831	830613	1.2934e+06		79.0275	158.055	246.961	493.922	390788	625831	830613	1.2934e+06
	Mix2	10.7527	25.0896	0	0		106.346	212.692	332.331	664.661	426582	706546	893915	1.54796e+06		106.346	212.692	332.331	664.661	426582	706546	893915	1.54796e+06
	Mix3	22.2222	22.2222	0	0		136.002	272.005	425.008	850.015	438064	739470	943075	1.67067e+06		136.002	272.005	425.008	850.015	438064	739470	943075	1.67067e+06
	Mix4	18.2349	7.29395	3.64697	7.29395		109.536	219.073	342.301	684.603	423773	701305	905851	1.45993e+06		109.536	219.073	342.301	684.603	423773	701305	905851	1.45993e+06
	Mix5	36.1011	0	0	12.0337		158.904	317.808	496.575	993.149	428737	728540	968037	1.66331e+06		158.904	317.808	496.575	993.149	428737	728540	968037	1.66331e+06
	Mix6	47.619	15.873	0	0		201.671	403.342	630.222	1260.44	463489	812374	1.05193e+06	1.94238e+06		201.671	403.342	630.222	1260.44	463489	812374	1.05193e+06	1.94238e+06
	Mix7	45.045	9.00901	6.00601	0		181.371	362.741	566.783	1133.57	467132	811662	1.0422e+06	1.79359e+06		181.371	362.741	566.783	1133.57	467132	811662	1.0422e+06	1.79359e+06
	Mix8	111.111	0	0	0		365.842	731.685	1143.26	2286.51	527053	994635	1.32407e+06	2.62166e+06		365.842	731.685	1143.26	2286.51	527053	994635	1.32407e+06	2.62166e+06
							79.7	159.3	248.9	497.9	374892	589477	823606	1221043			K80	K160	K250	K500
							112.2	224.4	350.6	701.2	411303	683606	850921	1515837		Manure	0.0411573	0.0411573	0.0411573	0.0411573
							134.6	269.3	420.7	841.4	458327	789654	1011043	1748756		Inter	0.0353441	0.0353441	0.0353441	0.0353441
							108.5	216.9	338.9	667.8	411303	683606	850921	1451427		Grass	0.015782	0.015782	0.015782	0.015782
							158.6	317.1	495.5	991	458327	789654	1011043	1768756		Corn	0.0415894	0.0415894	0.0415894	0.0415894
							194.5	388.9	607.7	1215.4	460704	780409	1031043	1884821
							182	364	568.7	1137.3	474704	822409	1075558	1798756			K80	K160	K250	K500
							368.6	737.1	1151.7	2303.4	516058	981547	1305558	2603514		Manure	59.2935	55.9483	47.6665	47.1898
																Inter	187.118	152.028	122.087	103.171
							0.991562	0.992185	0.99221	0.99201	1.0424	1.06167	1.00851	1.05926		Grass	246.84	196.982	153.478	88.5872
							0.947823	0.947823	0.947891	0.947891	1.03715	1.03356	1.05053	1.02119		Corn	267.47	210.541	178.776	134.873
							1.01042	1.01004	1.01024	1.01024	0.955789	0.936448	0.932774	0.955348
							1.00955	1.01002	1.01004	1.02516	1.03032	1.02589	1.06455	1.00586
							1.00192	1.00223	1.00217	1.00217	0.935439	0.922607	0.957464	0.940386
							1.03687	1.03714	1.03706	1.03706	1.00605	1.04096	1.02026	1.03054
							0.996542	0.996542	0.99663	0.996717	0.984048	0.986932	0.968989	0.99713
							0.992519	0.992653	0.992669	0.992669	1.02131	1.01333	1.01418	1.00697
							0.947823	0.947823	0.947891	0.947891	0.935439	0.922607	0.932774	0.940386
							1.03687	1.03714	1.03706	1.03706	1.0424	1.06167	1.06455	1.05926
